# Supplementary material for: Mutations in spliceosome genes in myelodysplastic neoplasms and their association to ring sideroblasts
Source: PubMed Central journal article supplement (PMC9898028; doi:10.1038/s41375-022-01783-y), 2022-12-03
Supplement: 41375_2022_1783_MOESM1_ESM.pdf [file 41375_2022_1783_MOESM1_ESM.pdf]

## **Supplemental Material**

### **Supplementary Text**

#### **Methods**

##### **Statistical analysis**

Statistical analyses were performed using SPSS version 19.0 (IBM Corporation, Armonk, NY). Analyses for overall survival (OS) was performed according to Kaplan-Meier and compared using two-sided log rank tests. Dichotomous variables were compared using chi-square test. All results were considered significant at  $p < 0.05$ .

#### **Results**

##### ***Cases with multiple splicing mutations***

Notably, 10/13 cases with multiple splicing mutations showed RS  $\geq 15\%$ , all harboring *SF3B1* mutations (Suppl. Figure S2B; Suppl. Table S2; *SF3B1*+*ZRSR2*: n=6; *SF3B1*+*SRSF2*: n=3; *SF3B1*+*U2AF1*: n=1). We did not find copy loss or CN-LOH at any splicing gene loci in any of the 10 cases. Based on the VAFs, it was not clear in 6 cases whether both mutations appeared in the same clone or in different, independent clones. However, in 4 cases the VAFs of both splicing mutations indicated their occurrence in the same clone. Of those 4 cases, the *SF3B1* mutation seemed to be in the dominating clone in two cases, while in one case *ZRSR2* was the dominating mutation. In another case *SF3B1* and *SRSF2* showed similar VAFs.

##### ***Additional co-mutations in SF3B1 mutated patients***

We further analyzed the *SF3B1* mutated cases (without complex karyotypes and *SF3B1* VAF  $\geq 5\%$  as suggested by WHO 2022; n=161) for the presence of mutations in *BCOR*, *BCORL1*, *NRAS*, *STAG2* and *SRSF2*, as they were previously described as unfavorable risk factors in *SF3B1* mutated patients [1]. In total, we found 8 cases with

corresponding mutations (*BCOR*: n=3, *BCORL1*: n=0, *NRAS*: n=0, *STAG2*: n=2, *SRSF2*: n=3). *SF3B1* mutated patients with additional *BCOR*, *STAG2* or *SRSF2* mutations showed a trend towards shorter OS (median OS: 5.6 vs. 8.4 years; p=0.205; Suppl. Figure S4J), however not reaching statistical significance presumably due to the small samples size.

## Supplementary Tables

Table S1. Classification and entity criteria of MDS with *SF3B1* mutations

| Criteria               | 5 <sup>th</sup> edition of WHO [A]                          | ICC [B]                                                               |
|------------------------|-------------------------------------------------------------|-----------------------------------------------------------------------|
|                        | MDS with low blasts and <i>SF3B1</i> mutation*              | MDS with mutated <i>SF3B1</i>                                         |
| Cytopenia              | ≥1                                                          | ≥1                                                                    |
| Dysplasia              | ≥1                                                          | <b>Not required</b>                                                   |
| Blasts                 | <5% BM; <2% PB                                              | <5% BM; <2% PB                                                        |
| Cytogenetics           | Absence of 5q deletion, monosomy 7, or complex karyotype ** | Absence of isolated del(5q), -7/del(7q), abn3q26.2, or complex        |
| Mutations              | <i>SF3B1</i> (VAF ≥5%) without biallelic <i>TP53</i> **     | <i>SF3B1</i> (VAF ≥10%) without <i>RUNX1</i> or multi-hit <i>TP53</i> |
| Ring sideroblasts (RS) | Not required                                                | Not required                                                          |

\* Possible substitution of *SF3B1* mutation by detecting ≥15% RS. Acceptable related terminology: MDS with low blasts and ring sideroblasts.

\*\* Excluding AML-defining genetic abnormalities

[A] Khoury *et al.*, *Leukemia*, 2022; 36(7):1703-19; Variant allelic frequency (VAF) criteria retrieved from <https://tumourclassification.iarc.who.int/chaptercontent/63/23>. Accessed 06 Sep 2022. [B] Arber *et al.*, *Blood*, 2022; 140(11):1200-28.

Table S2. MDS cases with low blasts and RS ≥15% with multiple splicing mutations

| Sample | <i>SF3B1</i> VAF | <i>ZRSR2</i> VAF | <i>SRSF2</i> VAF | <i>U2AF1</i> VAF |
|--------|------------------|------------------|------------------|------------------|
| #1     | 47%              | 31%              |                  |                  |
| #2     | 47%              | 5%               |                  |                  |
| #3     | 9%               | 55%              |                  |                  |
| #4     | 33%              | 4%               |                  |                  |
| #5     | 32%              | 7%               |                  |                  |
| #6     | 15%              | 19%              |                  |                  |
| #7     | 44%              |                  | 41%              |                  |
| #8     | 31%              |                  | 4%               |                  |
| #9     | 42%              |                  | 4%               |                  |
| #10    | 29%              |                  |                  | 13%              |

VAF: Variant allelic frequency

## Supplementary Figures

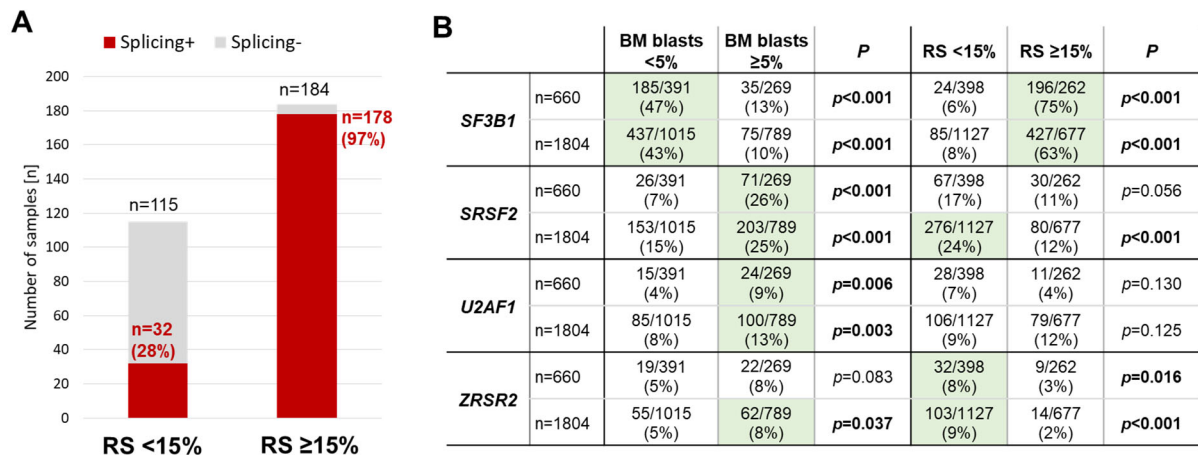

**Supplementary Figure S1: Frequency and association of splicing gene mutations in MDS. (A)** Distribution and frequency of splicing genes *SF3B1*, *SRSF2*, *U2AF1* and *ZRSR2* (red: mutated = splicing+; grey: wild-type = splicing-) within low blast MDS (n=299) grouped into harboring ring sideroblasts (RS) <15% or ≥15%. **(B)** Association of *SF3B1*, *SRSF2*, *U2AF1* and *ZRSR2* mutations with BM blasts (<5% vs. ≥5%) and RS (<15% vs. ≥15%) within MDS cases with available RS data (n=660) and an independent validation cohort (n=1804); *p*-values in bold: statistical significance (*p*≤0.05).

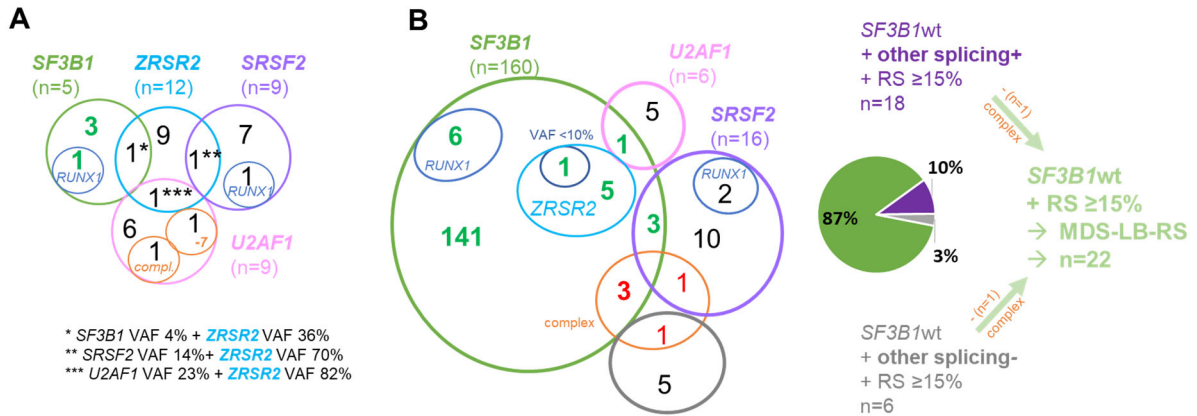

**Supplementary Figure S2: Cases with splicing gene mutations in low blast MDS and their additional genetic abnormalities. (A)** Number of cases with splicing gene mutations in low blast MDS with RS <15% (n=115). compl.: complex karyotype; -7: monosomy 7; *RUNX1*: additional *RUNX1* mutation; VAF: variant allelic frequency; **(B)** Number and frequency of cases with splicing gene mutations in low blast MDS with RS ≥15% (n=184) and the categorization of samples into MDS-LB-RS according to WHO 2022. complex: complex karyotype; *RUNX1*: additional *RUNX1* mutation; wt: wild-type; other splicing+/-: with (+) / without (-) mutation in splicing genes *SRSF2*, *U2AF1* or *ZRSR2*. VAF: variant allelic frequency.

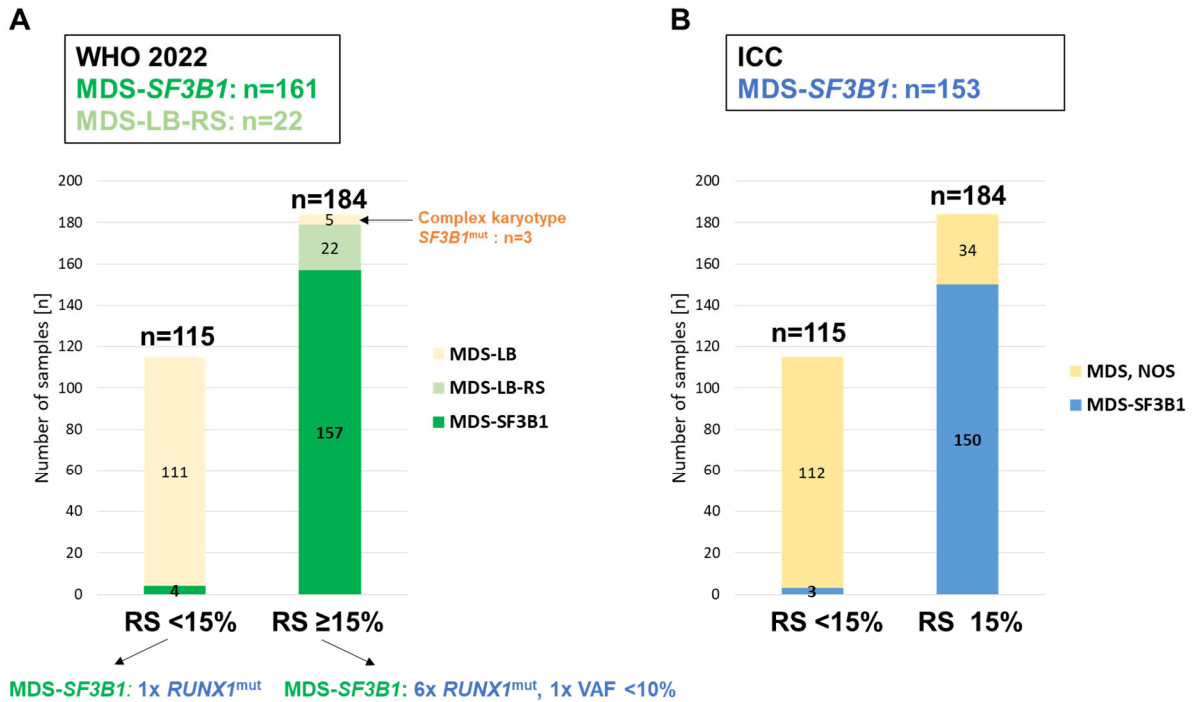

**Supplementary Figure S3: Classification and distribution of subsets within low blast MDS (n = 299).** (A) Cases were categorized according to WHO 2022 and grouped into ring sideroblasts (RS) <15% or ≥15%. VAF: variant allelic frequency; mut: mutation. (B) Cases were categorized according to ICC and grouped into ring sideroblasts (RS) <15% or ≥15%.

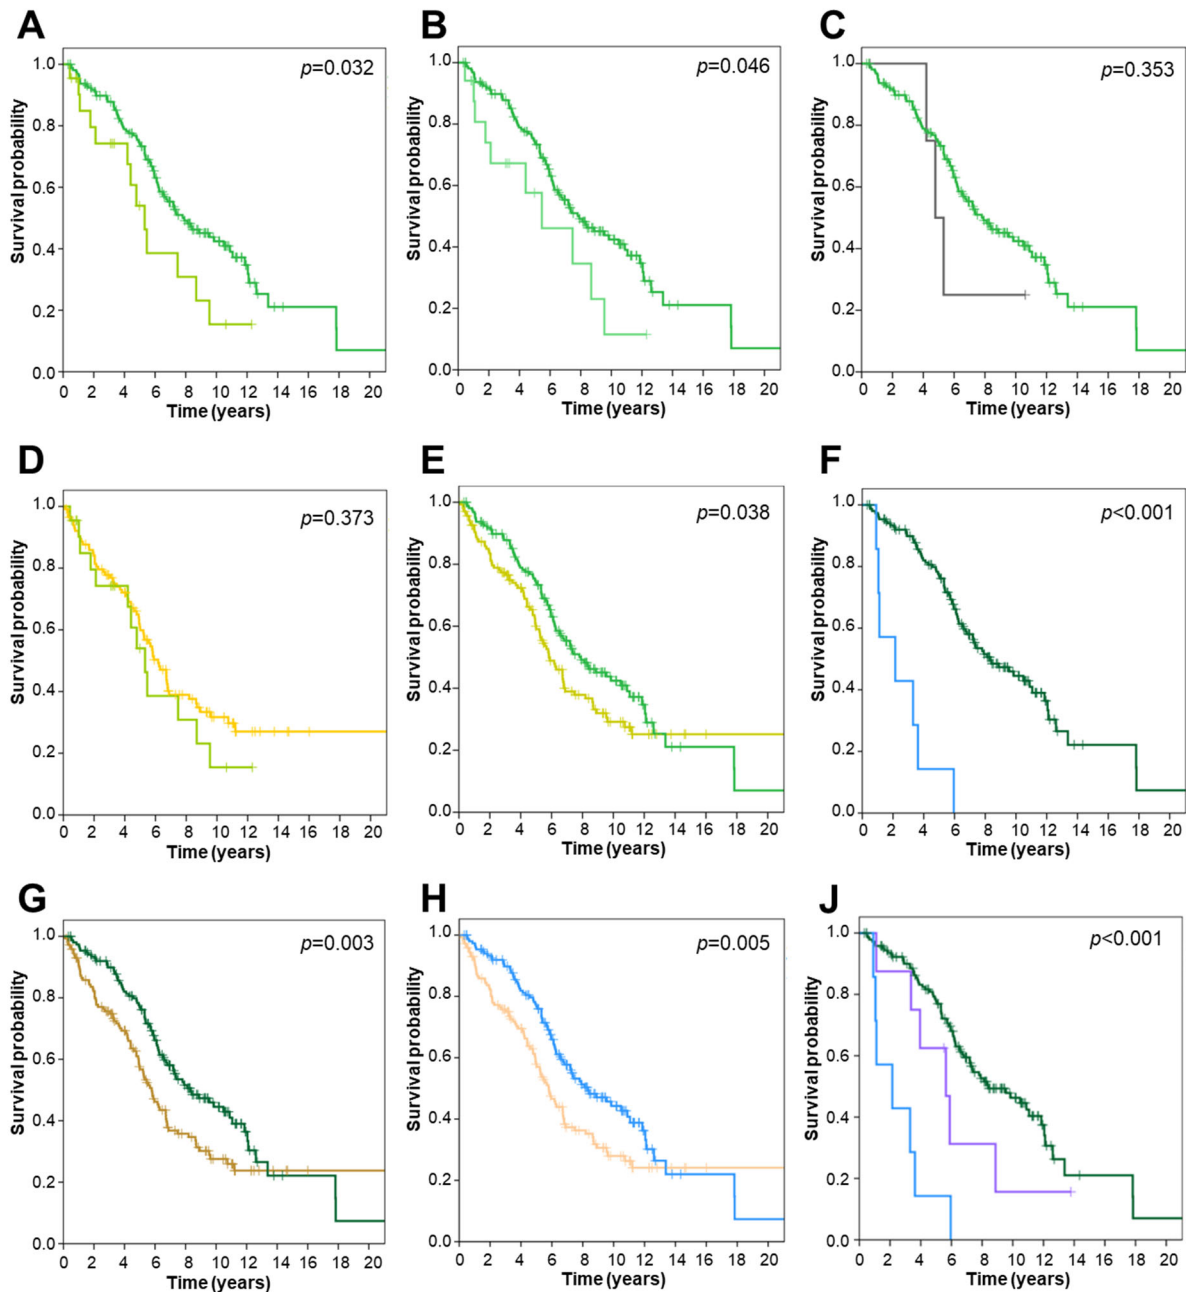

**Supplementary Figure S4: Kaplan-Meier plots of different subsets within low blast MDS patients.** (A) Overall survival (OS) of MDS-SF3B1 (n=161; green) compared to MDS-LB-RS (n=22; neon green) according to WHO 2022. (B) OS of MDS-SF3B1 (n=161; green) compared to MDS-LB-RS harbouring splicing mutations (n=17; light green) according to WHO 2022. (C) OS of MDS-SF3B1 (n=161; green) compared to MDS-LB-RS without splicing mutations (n=5; grey) according to WHO 2022. (D) OS of MDS-LB (n=116; yellow) compared to MDS-LB-RS (n=22; light green) according to WHO 2022. (E) OS of MDS-SF3B1 (n=161; green) compared to non-MDS-SF3B1 represented by MDS-LB and MDS-LB-RS (n=138; light brown) according

to WHO 2022. **(F)** OS of WHO MDS-*SF3B1* without additional *RUNX1* mutations (n=154; dark green) compared to with additional *RUNX1* (n=7; blue). **(G)** OS of WHO MDS-*SF3B1* without additional *RUNX1* mutations (n=154; dark green) compared to remaining low blast MDS (n=145; brown). **(H)** OS of MDS-*SF3B1* (n=153; blue) compared to MDS, NOS (n=146; rose) according to ICC. **(J)** OS of WHO MDS-*SF3B1* with additional *RUNX1* (n=7; blue) or with additional *BCOR*, *STAG2* or *SRSF2* mutations (n=8; purple) compared to cases without corresponding additional mutations (n=146; dark green).

## References

1. Bernard E, Tuechler H, Greenberg Peter L, Hasserjian Robert P, Arango Ossa Juan E, Nannya Y, et al. Molecular International Prognostic Scoring System for Myelodysplastic Syndromes. *NEJM Evidence*. 2022;1(7):EVIDoa2200008.
